# Supplementary figures and images for: Quantum stereodynamics of the Na(2S) + NaLi(X1Σ+) → Li(2S) + Na2(X1Σ+g) reaction: effect of NaLi molecular alignment
Source: Royal Society of Chemistry journal article supplement (doi:10.1039/d5cp01506e), 2025-01-01

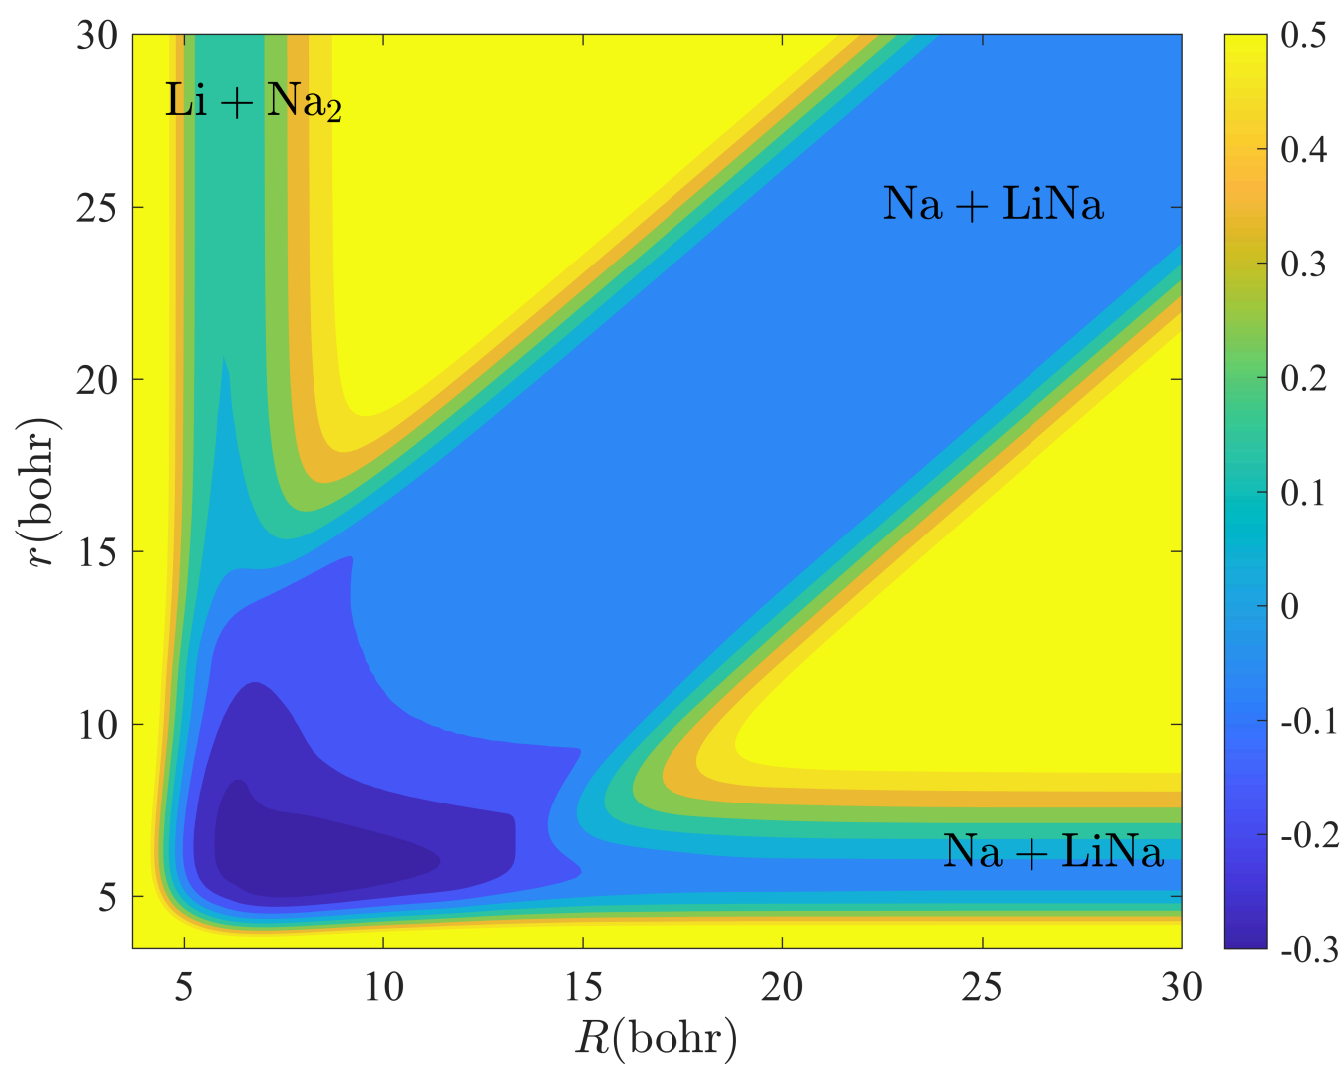

Supplement: d5cp01506e3.pdf [file d5cp01506e3.pdf]
